# Supplementary material for: Construction of 2D zinc(ii) MOFs with tricarboxylate and N-donor mixed ligands for multiresponsive luminescence sensors and CO2 adsorption
Source: Royal Society of Chemistry journal article supplement (doi:10.1039/d4dt01825g), 2024-01-01
Supplement: d4dt01825g1.pdf [file d4dt01825g1.pdf]

## Supporting Information

### Construction of 2D zinc(II) MOFs with tricarboxylate and *N*-donor mixed ligands for multiresponsive luminescence sensor and CO<sub>2</sub> adsorption

Kenika Khotchasanthong,<sup>a</sup> Kunlanit Chinchana,<sup>a</sup> Kanokwan Kongpatpanich,<sup>b</sup> Waraporn Pinyo,<sup>c</sup> Filip Kielar,<sup>d</sup> Winya Dungkaew,<sup>e</sup> Mongkol Sukwattanasinitt,<sup>f</sup> Sakchai Laksee,<sup>g</sup> and Kittipong Chainok<sup>\*a,h</sup>

<sup>a</sup>Thammasat University Research Unit in Multifunctional Crystalline Materials and Applications (TU-MCMA), Faculty of Science and Technology, Thammasat University, Pathum Thani 12121, Thailand, E-mail: kc@tu.ac.th; Fax: +662 654 4548; Tel: +66 86 339 5079

<sup>b</sup>School of Molecular Science and Engineering, Vidyasirimedhi Institute of Science and Technology, Rayong 21210, Thailand

<sup>c</sup>NSTDA Characterization and Testing Center, Thailand Science Park, Pathum Thani 12120, Thailand

<sup>d</sup>Department of Chemistry, Faculty of Science, Naresuan University, Phitsanulok 65000, Thailand

<sup>e</sup>Department of Chemistry, Faculty of Science, Mahasarakham University, Maha Sarakham 43100, Thailand

<sup>f</sup>Department of Chemistry, Faculty of Science, Chulalongkorn University, Bangkok 10330, Thailand

<sup>g</sup>Nuclear Technology Research and Development Center, Thailand Institute of Nuclear Technology (Public Organization), Ongkharak, Nakhon Nayok, 26120, Thailand

<sup>h</sup>Center of Excellence on Petrochemical and Materials Technology, Chulalongkorn University, Bangkok 10330, Thailand

**Table S1** Crystallographic data and refinement summary for **1** and **2**.

| Compound (CCDC No.)                                                                  | <b>1 (2363871)</b>                                                             | <b>2 (2363872)</b>                                                             |
|--------------------------------------------------------------------------------------|--------------------------------------------------------------------------------|--------------------------------------------------------------------------------|
| Empirical formula                                                                    | C <sub>67</sub> H <sub>62</sub> N <sub>7</sub> O <sub>13</sub> Zn <sub>2</sub> | C <sub>69</sub> H <sub>71</sub> N <sub>8</sub> O <sub>16</sub> Zn <sub>2</sub> |
| Formula weight                                                                       | 1302.96                                                                        | 1399.07                                                                        |
| Temperature (K)                                                                      | 100(2)                                                                         | 100(2)                                                                         |
| Crystal system                                                                       | Monoclinic                                                                     | Triclinic                                                                      |
| Space group                                                                          | <i>P</i> 2 <sub>1</sub> / <i>n</i>                                             | <i>P</i> -1                                                                    |
| <i>a</i> (Å)                                                                         | 16.3834(5)                                                                     | 14.5880(4)                                                                     |
| <i>b</i> (Å)                                                                         | 27.2898(9)                                                                     | 16.0895(4)                                                                     |
| <i>c</i> (Å)                                                                         | 17.2612(6)                                                                     | 16.5097(4)                                                                     |
| $\alpha$ (°)                                                                         | 90                                                                             | 65.0510(10)                                                                    |
| $\beta$ (°)                                                                          | 112.9720(10)                                                                   | 86.8360(10)                                                                    |
| $\gamma$ (°)                                                                         | 90                                                                             | 89.4830(10)                                                                    |
| <i>V</i> (Å <sup>3</sup> )                                                           | 7105.4(4)                                                                      | 3507.66(16)                                                                    |
| <i>D</i> <sub>calc</sub> (g cm <sup>-3</sup> )                                       | 1.218                                                                          | 1.325                                                                          |
| <i>Z</i>                                                                             | 4                                                                              | 2                                                                              |
| $\mu$ (mm <sup>-1</sup> )                                                            | 1.340                                                                          | 1.430                                                                          |
| Reflections collected                                                                | 76405                                                                          | 42959                                                                          |
| Unique Reflections                                                                   | 13441                                                                          | 13708                                                                          |
| <i>R</i> <sub>1</sub> , <i>wR</i> <sub>2</sub> ( <i>I</i> > 2 $\sigma$ ( <i>I</i> )) | 0.0660, 0.1885                                                                 | 0.0608, 0.1957                                                                 |
| <i>R</i> <sub>1</sub> , <i>wR</i> <sub>2</sub> (all data)                            | 0.0716, 0.1945                                                                 | 0.0643, 0.2010                                                                 |
| GOF on <i>F</i> <sup>2</sup> , <i>S</i>                                              | 1.038                                                                          | 1.043                                                                          |
| $\Delta\rho_{\max}$ , $\Delta\rho_{\min}$ (e Å <sup>-3</sup> )                       | 2.96, -0.88                                                                    | 1.60, -0.55                                                                    |

**Table S2** Selected bond lengths and bond angle (Å, °) for **1** and **2**.

|                                         | <b>1</b>   |                                           | <b>2</b>   |
|-----------------------------------------|------------|-------------------------------------------|------------|
| Zn1–O1                                  | 1.996(2)   | Zn1–O1                                    | 1.946(2)   |
| Zn1–O7                                  | 1.977(2)   | Zn1–O3 <sup>i</sup>                       | 1.9650(19) |
| Zn1–O12 <sup>i</sup>                    | 1.981(2)   | Zn1–O6 <sup>ii</sup>                      | 1.951(2)   |
| Zn1–N1                                  | 2.005(3)   | Zn1–N1                                    | 2.095(3)   |
| Zn2–O3                                  | 1.964(2)   | Zn2–O7                                    | 1.968(2)   |
| Zn2–O5 <sup>ii</sup>                    | 1.968(2)   | Zn2–O10 <sup>iii</sup>                    | 1.9893(19) |
| Zn2–O9 <sup>iii</sup>                   | 2.028(2)   | Zn2–O11 <sup>iv</sup>                     | 2.124(3)   |
| Zn2–N3                                  | 2.041(2)   | Zn2–O12 <sup>iv</sup>                     | 2.188(2)   |
| O1–Zn1–N1                               | 121.64(10) | Zn2–N2                                    | 2.130(3)   |
| O7–Zn1–O1                               | 101.32(9)  | O1–Zn1–O3 <sup>i</sup>                    | 130.52(9)  |
| O7–Zn1–O12 <sup>i</sup>                 | 129.34(9)  | O1–Zn1–O6 <sup>ii</sup>                   | 120.47(9)  |
| O7–Zn1–N1                               | 95.99(10)  | O1–Zn1–N1                                 | 101.07(10) |
| O12 <sup>i</sup> –Zn1–O1                | 100.23(9)  | O3 <sup>i</sup> –Zn1–N1                   | 100.57(10) |
| O12 <sup>i</sup> –Zn1–N1                | 110.35(10) | O6 <sup>ii</sup> –Zn1–O3 <sup>i</sup>     | 101.37(9)  |
| O3–Zn2–O5 <sup>ii</sup>                 | 123.55(9)  | O6 <sup>ii</sup> –Zn1–N1                  | 94.61(12)  |
| O3–Zn2–O9 <sup>iii</sup>                | 118.59(9)  | O7–Zn2–O10 <sup>ii</sup>                  | 103.79(10) |
| O5 <sup>ii</sup> –Zn2–O9 <sup>iii</sup> | 99.80(9)   | O7–Zn2–O11 <sup>iv</sup>                  | 109.97(10) |
| O3–Zn2–N3                               | 100.43(9)  | O7–Zn2–O12 <sup>iv</sup>                  | 112.12(10) |
| O5 <sup>ii</sup> –Zn2–N3                | 116.45(10) | O7–Zn2–N2                                 | 91.74(11)  |
| O9 <sup>iii</sup> –Zn2–N3               | 95.18(9)   | O10 <sup>iii</sup> –Zn2–O11 <sup>iv</sup> | 144.30(10) |
|                                         |            | O10 <sup>iii</sup> –Zn2–O12 <sup>iv</sup> | 96.85(9)   |
|                                         |            | O10 <sup>iii</sup> –Zn2–N2                | 92.27(9)   |
|                                         |            | O11 <sup>iv</sup> –Zn2–O12 <sup>iv</sup>  | 59.99(10)  |
|                                         |            | O11 <sup>iv</sup> –Zn2–N2                 | 97.90(10)  |
|                                         |            | N2–Zn2–O12 <sup>iv</sup>                  | 151.37(11) |

Symmetry codes: (i)  $x - 1, y, z$ ; (ii)  $x + 1, y, z$ ; (iii)  $x, y - 1, z$ ; (iv)  $x, y + 1, z$  for **1**;(i)  $x, y - 1, z$ ; (ii)  $x, y, z - 1$ ; (iii)  $x, y + 1, z - 1$ ; (iv)  $x, y + 1, z$  for **2**.

**Table S3** Examples of Zn-based MOF luminescent sensors for metal ion detection.

| Zn-based MOFs                                                                                                                    | Ions             | $K_{sv}$ ( $M^{-1}$ ) | LOD           | Ref |
|----------------------------------------------------------------------------------------------------------------------------------|------------------|-----------------------|---------------|-----|
| [Zn <sub>2</sub> (L <sup>1</sup> ) <sub>2</sub> (bpp)(H <sub>2</sub> O) <sub>2</sub> ]                                           | Fe <sup>3+</sup> | $1.68 \times 10^4$    | 1.76 $\mu$ M  | 1   |
|                                                                                                                                  | Hg <sup>2+</sup> | $1.34 \times 10^4$    | 3.75 $\mu$ M  | 1   |
| [ZnL <sup>2</sup> (dpa)]                                                                                                         | Fe <sup>3+</sup> | $3.09 \times 10^4$    | 1.94 $\mu$ M  | 2   |
| HBU-19                                                                                                                           | Fe <sup>3+</sup> | $2.24 \times 10^5$    | 3.40 $\mu$ M  | 3   |
| TMU-16                                                                                                                           | Fe <sup>3+</sup> | $2.80 \times 10^4$    | 20.0 $\mu$ M  | 4   |
| TMU-48                                                                                                                           | Fe <sup>3+</sup> | $1.86 \times 10^5$    | 1.79 $\mu$ M  | 5   |
| [Zn(BBDF)(ATP)]·2DMF·3H <sub>2</sub> O                                                                                           | Hg <sup>2+</sup> | $3.89 \times 10^4$    | 0.12 $\mu$ M  | 6   |
| [Zn(TIBTC)(DMA)](Me <sub>2</sub> NH <sub>2</sub> )                                                                               | Fe <sup>3+</sup> | $9.71 \times 10^4$    | 6.40 $\mu$ M  | 7   |
| [Zn <sub>2</sub> (tpeb)(bpdc) <sub>2</sub> ](Me <sub>2</sub> NH <sub>2</sub> ) <sub>0.5</sub> ·4H <sub>2</sub> O                 | Fe <sup>3+</sup> | $1.33 \times 10^4$    | 0.88 $\mu$ M  | 8   |
| [Zn <sub>2</sub> (NO <sub>3</sub> ) <sub>2</sub> (4,4'-bpy) <sub>2</sub> (TBA)]                                                  | Fe <sup>3+</sup> | $7.48 \times 10^3$    | 7.18 $\mu$ M  | 9   |
| [Zn(5-AIP)(Ald-4)]·H <sub>2</sub> O                                                                                              | Fe <sup>3+</sup> | $9.00 \times 10^4$    | 0.30 $\mu$ M  | 10  |
|                                                                                                                                  | Cr <sup>3+</sup> | $2.30 \times 10^4$    | 0.46 $\mu$ M  |     |
| [Zn(tbda)]                                                                                                                       | Cr <sup>3+</sup> | $2.68 \times 10^4$    | 180 $\mu$ M   | 11  |
| [Me <sub>2</sub> NH <sub>2</sub> ] <sub>4</sub> [Zn <sub>6</sub> (qptc) <sub>3</sub> (trz) <sub>4</sub> ]·6H <sub>2</sub> O      | Cr <sup>3+</sup> | $4.39 \times 10^4$    | 1.00 $\mu$ M  | 12  |
| [Zn(L <sup>5</sup> )(H <sub>2</sub> O)]·H <sub>2</sub> O                                                                         | Cr <sup>3+</sup> | $2.03 \times 10^4$    | 2.44 $\mu$ M  | 13  |
| [Zn <sub>2</sub> (tbta)(phen)(OH)]·4H <sub>2</sub> O                                                                             | Cr <sup>3+</sup> | $1.44 \times 10^5$    | 0.18 $\mu$ M  | 14  |
|                                                                                                                                  | Cu <sup>2+</sup> | $2.01 \times 10^5$    | 0.07 $\mu$ M  |     |
| [Zn <sub>2</sub> (L <sup>6</sup> )(phen)(H <sub>2</sub> O) <sub>3</sub> ]·2.4H <sub>2</sub> O                                    | Cu <sup>2+</sup> | $4.38 \times 10^5$    | 134 $\mu$ M   | 15  |
| [Zn(bpy)(H <sub>2</sub> O) <sub>4</sub> ][Zn(H <sub>2</sub> L <sup>6</sup> ) <sub>2</sub> (bpy)(H <sub>2</sub> O) <sub>2</sub> ] | Cu <sup>2+</sup> | $7.29 \times 10^4$    | 33.1 $\mu$ M  |     |
| [Zn <sub>2</sub> (5-AIA) <sub>2</sub> (DPTTZ)]·DMF                                                                               | Hg <sup>2+</sup> | $4.20 \times 10^4$    | 2.17 $\mu$ M  | 16  |
| [Zn(4-pzpt) <sub>2</sub> (H <sub>2</sub> O)]                                                                                     | Hg <sup>2+</sup> | $1.09 \times 10^3$    | 26.70 $\mu$ M | 17  |
| [Zn(4-pzpt) <sub>2</sub> ]·CH <sub>3</sub> OH                                                                                    | Hg <sup>2+</sup> | $7.13 \times 10^2$    | 34.08 $\mu$ M |     |
| ZU-1                                                                                                                             | Hg <sup>2+</sup> | $7.50 \times 10^8$    | 3.00 $\mu$ M  | 18  |
| MOF-5-NH <sub>2</sub>                                                                                                            | Cu <sup>2+</sup> | -                     | 0.06 $\mu$ M  | 19  |
|                                                                                                                                  | Pb <sup>2+</sup> | $2.8 \times 10^2$     | 0.25 $\mu$ M  |     |
| [Zn(HPydc) <sub>2</sub> ]·2H <sub>2</sub> O                                                                                      | Pb <sup>2+</sup> | $5.47 \times 10^2$    | 5.15 $\mu$ M  | 20  |
| [Zn-APT]                                                                                                                         | Fe <sup>2+</sup> | $1.90 \times 10^4$    | 0.12 $\mu$ M  | 21  |
| [Zn(ATA)(L <sup>7</sup> )]·H <sub>2</sub> O                                                                                      | Fe <sup>3+</sup> | $0.56 \times 10^3$    | 3.76 $\mu$ M  | 22  |
|                                                                                                                                  | Pb <sup>2+</sup> | $4.18 \times 10^4$    | 0.20 $\mu$ M  |     |
| [Zn(OBA)(DPT) <sub>0.5</sub> ]·DMF                                                                                               | Hg <sup>2+</sup> | $3.74 \times 10^3$    | 1.80 $\mu$ M  | 23  |
| [Zn(2-NH <sub>2</sub> bdc)(bibp)]                                                                                                | Hg <sup>2+</sup> | $4.55 \times 10^3$    | 42.0 $\mu$ M  | 24  |
| [Zn <sub>2</sub> (suc) <sub>2</sub> (4-nvp) <sub>2</sub> ]                                                                       | Pb <sup>2+</sup> | $3.80 \times 10^5$    | 0.05 $\mu$ M  | 25  |
| [Zn(fum)(4-nvp) <sub>2</sub> ]·2H <sub>2</sub> O                                                                                 | Pb <sup>2+</sup> | $8.22 \times 10^5$    | 0.13 $\mu$ M  | 26  |
| [Zn(mes)(4-nvp) <sub>2</sub> ]·H <sub>2</sub> O                                                                                  | Pb <sup>2+</sup> | $5.04 \times 10^5$    | 0.15 $\mu$ M  |     |
| [Zn(glu)(4-nvp)]                                                                                                                 | Pb <sup>2+</sup> | $4.90 \times 10^5$    | 0.15 $\mu$ M  |     |

|                                                                      |                  |                        |         |           |
|----------------------------------------------------------------------|------------------|------------------------|---------|-----------|
| [Zn(dtpp)(H <sub>2</sub> O)]                                         | Cu <sup>2+</sup> | 4.01 × 10 <sup>3</sup> | 250 μM  | 27        |
| [Zn <sub>3</sub> (L <sup>8</sup> ) <sub>2</sub> (dpp) <sub>2</sub> ] | Cu <sup>2+</sup> | 9.70 × 10 <sup>3</sup> | 1.05 μM | 28        |
| Compound 1                                                           | Fe <sup>3+</sup> | 2.08 × 10 <sup>4</sup> | 1.23 μM | This work |
|                                                                      | Fe <sup>2+</sup> | 1.44 × 10 <sup>4</sup> | 1.97 μM | This work |
|                                                                      | Cu <sup>2+</sup> | 8.89 × 10 <sup>4</sup> | 3.60 μM | This work |
|                                                                      | Cr <sup>3+</sup> | 5.55 × 10 <sup>3</sup> | 3.50 μM | This work |
|                                                                      | Pb <sup>2+</sup> | 5.40 × 10 <sup>3</sup> | 3.20 μM | This work |
|                                                                      | Hg <sup>2+</sup> | 8.02 × 10 <sup>3</sup> | 4.17 μM | This work |
| Compound 2                                                           | Fe <sup>3+</sup> | 1.86 × 10 <sup>4</sup> | 1.29 μM | This work |
|                                                                      | Fe <sup>2+</sup> | 1.00 × 10 <sup>4</sup> | 1.45 μM | This work |
|                                                                      | Cu <sup>2+</sup> | 6.26 × 10 <sup>4</sup> | 3.21 μM | This work |
|                                                                      | Cr <sup>3+</sup> | 6.89 × 10 <sup>3</sup> | 2.92 μM | This work |
|                                                                      | Pb <sup>2+</sup> | 1.45 × 10 <sup>4</sup> | 1.47 μM | This work |
|                                                                      | Hg <sup>2+</sup> | 2.98 × 10 <sup>3</sup> | 3.96 μM | This work |

bpp = 1,3-di(4-pyridyl)propane and; H<sub>2</sub>L<sup>1</sup> = 2,5-thiophenedicarboxylic acid ; H<sub>2</sub>L<sup>2</sup> = 4,4'-(ethynylimino)bis[benzoic acid]; dpa = 4,4'-dipyridylamine; L<sup>3</sup> = 2,3,5,6-tetra(4-carboxyphenyl)pyrazine; L<sup>4</sup> = 1,2-di(4-pyridyl)ethylene; BBDF = 2,7-bis(1*H*-benzimidazol-1-yl)-9,9-dimethyl-9*H*-fluorene); 3,5-H<sub>2</sub>btc = 1,3,5-benzenetricarboxylic acid; DAT = diamino triazole; H<sub>2</sub>ATP = 2-aminoterephthalic acid; H<sub>3</sub>TIBTC = 2,4,6-triiodo-1,3,5-benzenetricarboxylic acid; DMA = dimethylacetamide; H<sub>2</sub>tpeb = 1,3,5-tri-4-pyridyl-1,2-ethenylbenzene; H<sub>2</sub>bpdc = biphenyl-4,4'-dicarboxylic acid; H<sub>2</sub>TBA = 4-(1*H*-tetrazol-5-yl)-benzoic acid; 4,4'-bpy = 4,4'-bipyridine; 5-AIP = 5-amino isophthalate; Ald-4 = aldrithiol-4; H<sub>2</sub>tbdA = 4-(2,2';6',2''-tripyrindyl)-4'-1,2-phenyl dicarboxylic acid; H<sub>4</sub>qptc = terphenyl-2,5,2'5'-tetracarboxylic acid; trz = 1,2,4-triazole; H<sub>2</sub>L<sup>5</sup> = 5-(2-methylpyridin-4-yl)isophthalic acid; H<sub>3</sub>tbta = 1-(triazol-1-yl)-2,4,6-benzene tricarboxylic acid; phen = 1,10-phenanthroline; H<sub>4</sub>L<sup>6</sup> = (3,5-di(3,4-dicarboxylphenyl) pyridine); 2,2-bpy = 2,2-bipyridine; 5-AIA = 5-aminoisophthalic acid; DPTTZ = N,N'-di(4-pyridyl)-thiazolo-[5,4-d]thiazole; DMF = N,N'-dimethylformamide; 4-Hpzpt = 3-(pyridin-4-yl)-5-(pyrazin-2-yl)-1*H*-1,2,4-triazole; H<sub>2</sub>ndc = 1,4-Naphthalenedicarboxylic acid; H<sub>2</sub>Pydc = 2,3-Pyridinedicarboxylic acid; APT = 2-amino-6-purinethiol; TPC<sub>4</sub>A = 2,8,14,20-tetra-phenyl-6,12,18,24-tetra-methoxy-4,10,16,22-tetra-carboxy-methoxy-resorcin[4]arene; TNC<sub>4</sub>A = 2,8,14,20-tetra-1-naphthal-6,12,18,24-tetra- methoxy-4,10,16,22-tetra-carboxy-methoxy-resorcin[4]arene; L<sup>7</sup> = bipyridyl-based Schiff base, (*E*)-*N'*-(pyridin-4-ylmethylene)isonicotinohydrazide; H<sub>2</sub>ATA = amino functionalized 2-aminoterephthalic acid; H<sub>2</sub>OBA = 4,4'-oxybis(benzoic acid); DPT = 3,6-di(pyridin-4-yl)-1,2,4,5-tetrazine; 2-NH<sub>2</sub>bdc = 2-amino-1,4-benzenedicarboxylic acid; bibp = 4,4'-bis(imidazol-1-ylmethyl)biphenyl; H<sub>2</sub>suc = succinic acid; 4-nvp = 4-(1-naphthylvinyl)pyridine; H<sub>2</sub>fum = fumaric acid; 4-nvp = 4-(1-naphthylvinyl)pyridine; H<sub>2</sub>mes = mesaconic acid; H<sub>2</sub>glu = glutaric acid; H<sub>2</sub> dtpp = 2,5-di(1*H*-1,2,4-triazol-1-yl)terephthalic acid; L<sup>8</sup> = (3,5-dibromosalicylaldehyde salicylhydrazone); dpp = 1,3-di(4-pyridyl)propane; H<sub>2</sub>tpt = 2,4,6-tri(pyridin-4-yl)-1,3,5-triazine; H<sub>2</sub>tdc = 2,5-thiophenedicarboxylic acid.

## Referances

1. J. Huang, X.-Y. Pu, Z. Liu, X.-Y. Cao and J. Fu, *J. Inorg. Organomet. Polym. Mater.*, 2021, **31**, 2209–2217.
2. B. Zhao, J. Lu, H. Liu, S. Li, Q. Sun and B. Zhang, *CrystEngComm*, 2024, **26**, 1319–1327.
3. J.-M. Liu, Y.-B. Ren, H.-Y. Xu, L.-J. Li, Y.-J. Mu and J.-L. Du, *Inorg. Chim. Acta*, 2021, **527**, 120583–120588.
4. Y. D. Farahani and V. Safarifard, *J. Solid State Chem.*, 2019, **275**, 131–140.
5. L. Esrafil, M. Gharib and A. Morsali, *New J. Chem.*, 2019, **43**, 18079–18091.
6. C. Li, X. Sun, X. Meng, D. Wanga and C. Zheng, *Dalton Trans.*, 2023, **52**, 7611–7619.
7. C. H. Liu, Q. L. Guan, X. D. Yang, F. Y. Bai, L. X. Sun and Y. H. Xing, *Inorg. Chem.*, 2020, **59**, 8081–8098.
8. B. B. Rath and J. J. Vittal, *Inorg. Chem.*, 2020, **59**, 13, 8818–8826.
9. X. Zhang, X. R. Zhuang, N. X. Zhang, C. Y. Ge, X. Luo, J. X. Li, J. Wu, Q. F. Yang and R. Liu, *CrystEngComm*, 2019, **21**, 1948–1955.
10. P. Daga, P. Manna, P. Majee, D. K. Singha, S. Hui, A. K. Ghosh, P. Mahata and S. K. Mondal, *J. Inorg. Organomet. Polym. Mater.*, 2020, **30**, 4496–4509.
11. X. Liang, Y. Jia, Z. Zhan and Ming Hu, *Appl. Organometal. Chem.*, 2019, **33**, 1–11.
12. X.-X. Jia, R.-X. Yao, F.-Q. Zhang and X.-M. Zhang, *Inorg. Chem.*, 2017, **56**, 2690–2696.
13. X.-Y. Guo, F. Zhao, J.-J. Liu, Z.-L. Liu and Y.-Q. Wang, *J. Mater. Chem. A*, 2017, **5**, 20035–20043.
14. X. Chen, L. Shang, H. Cui, H. Yang, L. Liu, Y. Ren and J. Wang, *CrystEngComm*, 2020, **22**, 5900–5913.
15. X. Liu, Y. Liu, S. Feng and L. Lu, *J. Mol. Struct.*, 2023, **1274**, 134570–134578.
16. A. Nath, G. M Thomas, S. Hans, S. R. Vennapusa and S. Mandal, *Inorg. Chem.*, 2022, **61**, 2227–2233.
17. Y.-M. Fang, X. Ye, L. Xia, W.-W. Dong, J. Zhao and D.-S. Li, *J. Solid State Chem.*, 2018, **266**, 181–188.
18. M. S. Khan, S. Kamal, M. Zulkiflain, M. Khalid, S. Khan, M. Shahid, and M. Ahmad, *J. Mol. Liq.*, 2024, **405**, 125019–125027.
19. X. An, Q. Tan, S. Pan, H. Liu, X. Hu, *Spectrochim. Acta A Mol. Biomol. Spectrosc.*, 2021, **247**, 119073–119083.
20. M. Ashafaq, M. Khalid, M. Raizada, M. S. Ahmad, M. S. Khan, M. Shahid and M. Ahmad, *J. Inorg. Organomet. Polym. Mater.*, 2020, **30**, 4496–4509.
21. J. Wang, D. Yan, and W. Huang, *Inorg. Chem. Comm.*, 2022, **138**, 109282–109290.
22. B. Parmar, Y. Rachuri, K. K. Bisht and E. Suresh, *Inorg. Chem.*, 2017, **56**, 10939–10949.
23. S. A. A. Razavi, M. Y. Masoomi and A. Morsali, *Inorg. Chem.*, 2017, **56**, 16, 9646–9652.
24. L. Wen, X. Zheng, K. Lv, C. Wang and X. Xu, *Inorg. Chem.*, 2015, **54**, 7133–7135.
25. S. Bera, B. Dutta, D. Mandal, C. Sinha and M. H. Mir, *Inorg. Chem.*, 2022, **61**, 13244–13249.
26. B. Dutta, S. Bera, G. Bairy, M. Shit, S. Khanra, C. Sinha and M. H. Mir, *ES Energy Environ.*, 2022, **16**, 74–81.
27. H. Cai, N. Li, Y. Li and D.-M. An, *Inorg. Chim. Acta*, 2020, **512**, 119886–119891.
28. Y. Wu, Z. Gu, W. Luo, L. Wu, Y. Li, B. Xie and L. Zou, *Transit. Met. Chem.*, 2018, **43**, 673–681.



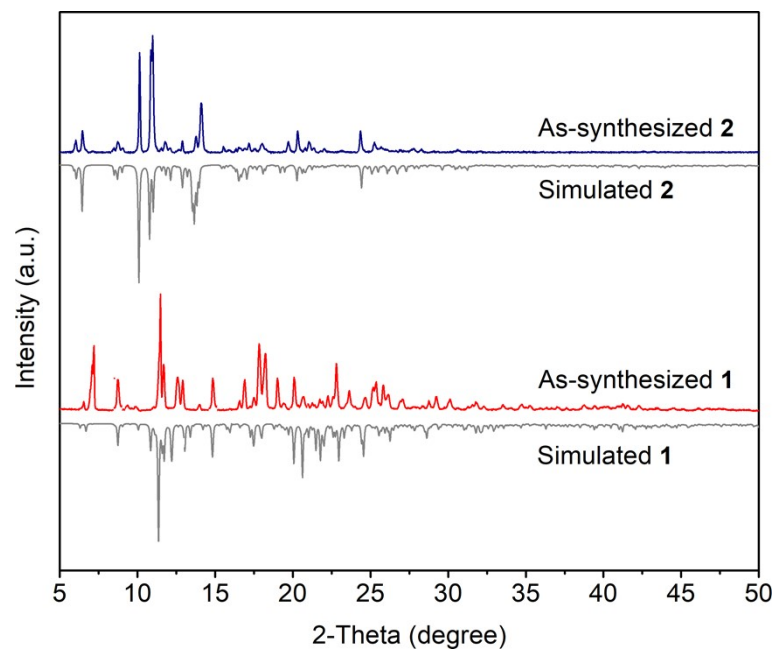

**Fig. S1** Comparison of the simulated and as-synthesized PXRD patterns for **1** and **2**.

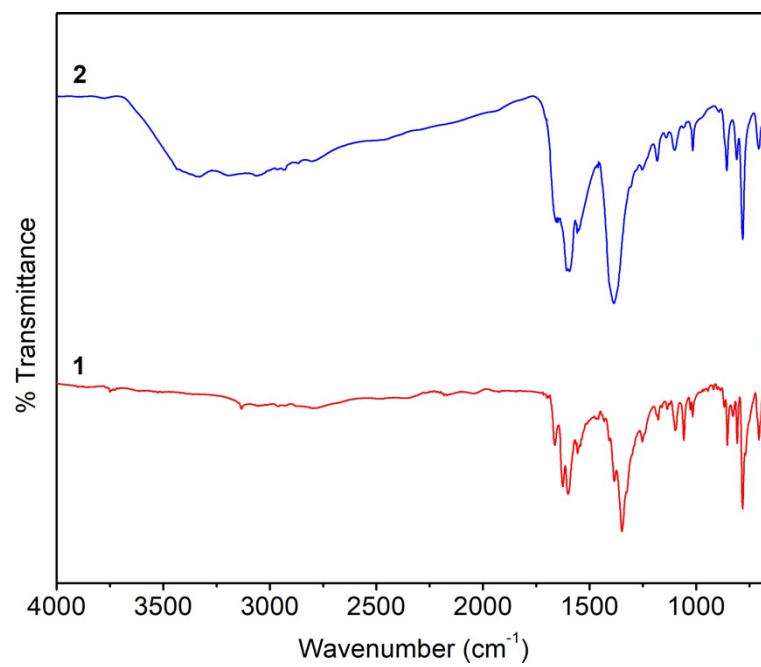

**Fig. S2** The IR spectra of **1** and **2**.



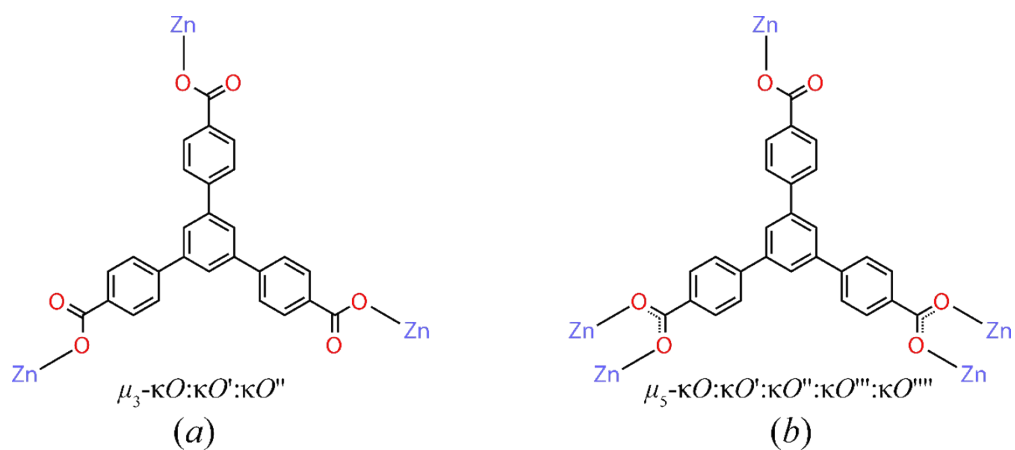

**Fig. S3** The coordination modes of the  $\text{btb}^{3-}$  ligands observed in **1** and **2**.

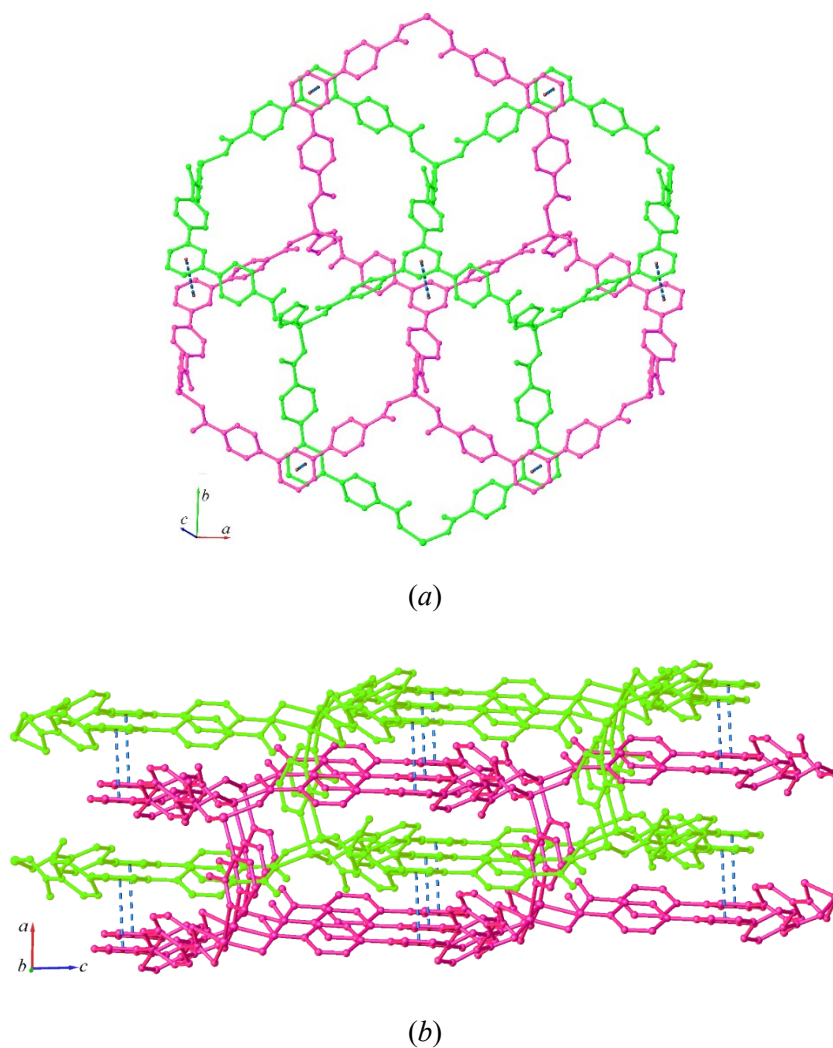

**Fig. S4** Views of  $\pi\cdots\pi$  stacking between neighboring  $\text{btb}^{3-}$  ligands for (a) **1** and (b) **2**.

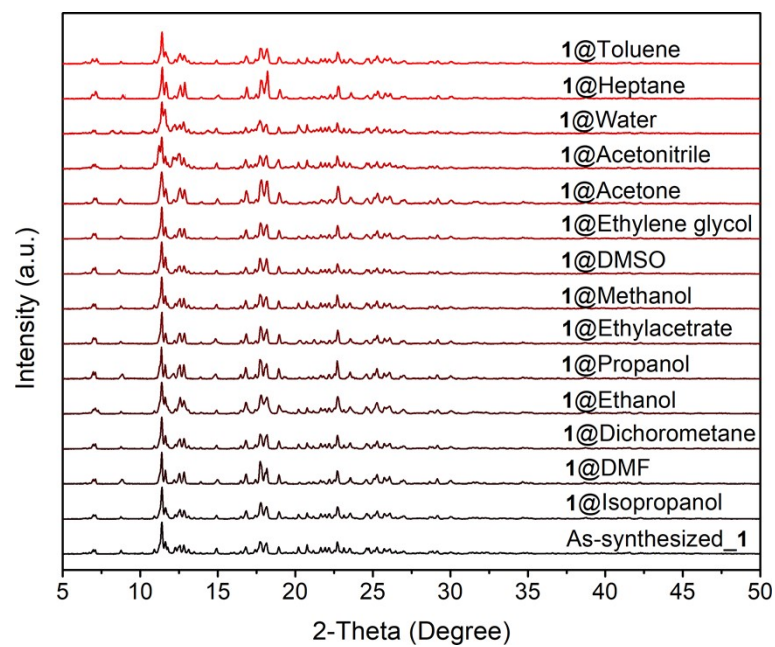

(a)

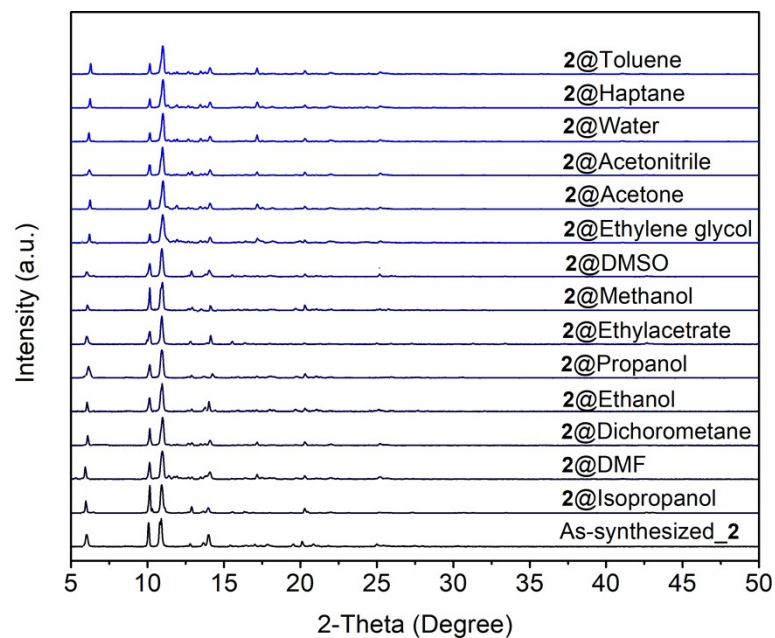

(b)

**Fig. S5** Room temperature PXRD patterns after two days of immersion in water and various organic solvents for (a) **1** and (b) **2**.

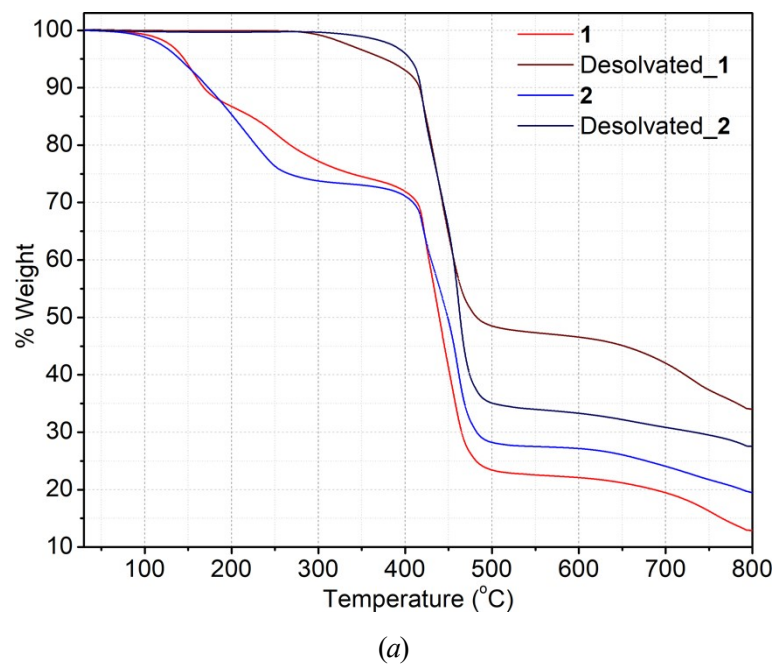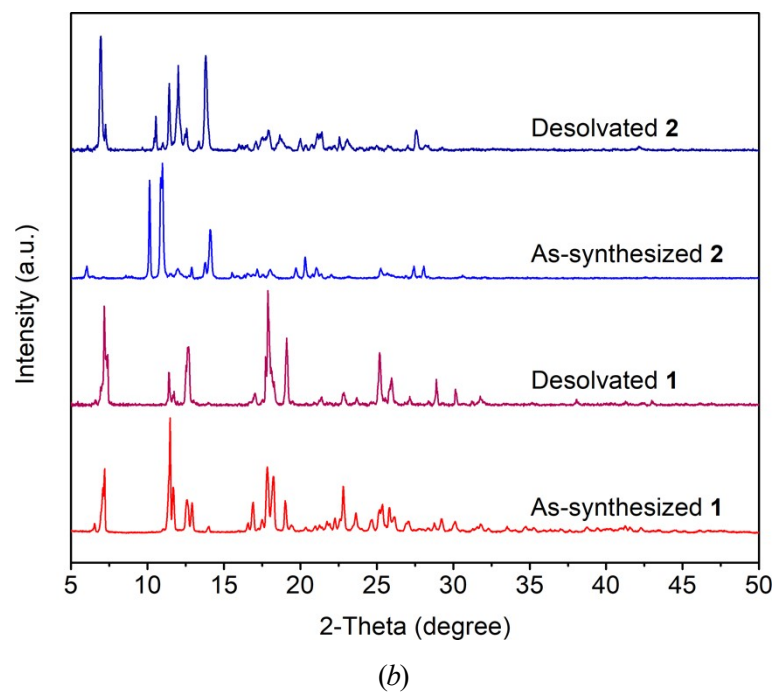

**Fig. S6** (a) TGA curves of **1** and **2**, and (b) comparison of the room temperature PXRD patterns for **1** and **2** before and after the desolvation processes.

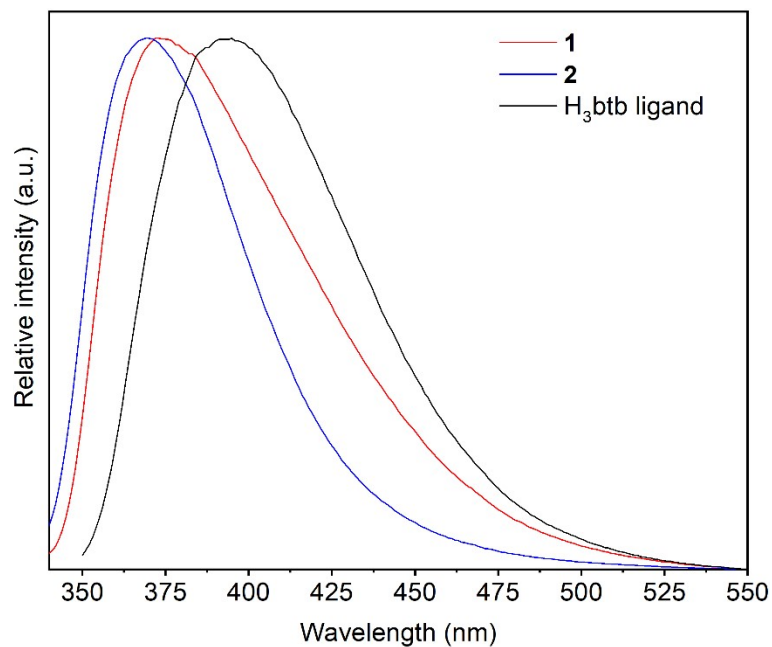

**Fig. S7** Solid-state photoluminescence spectra of **1**, **2**, and H<sub>3</sub>BTB at room temperature.

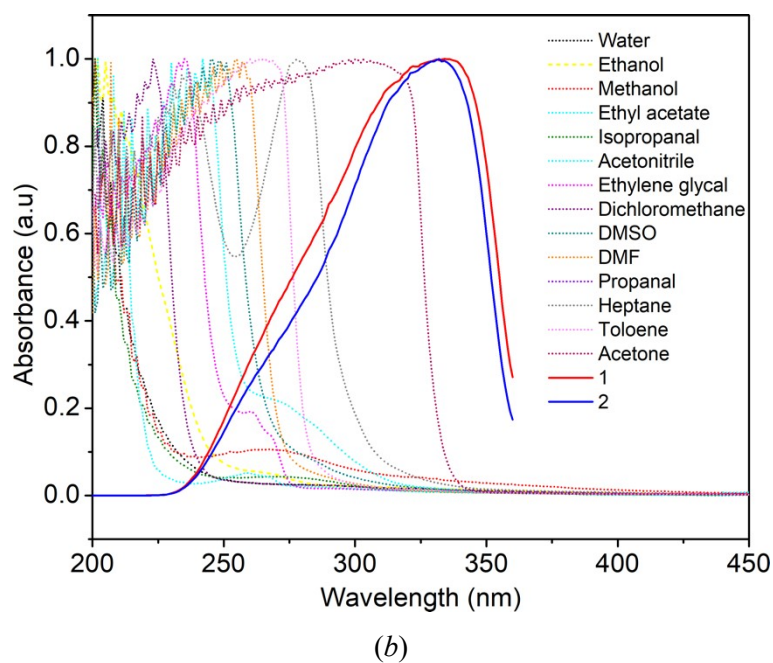

**Fig. S8** The UV-vis absorbance spectra of water and various organic compounds together with excitation spectra of **1** and **2**.

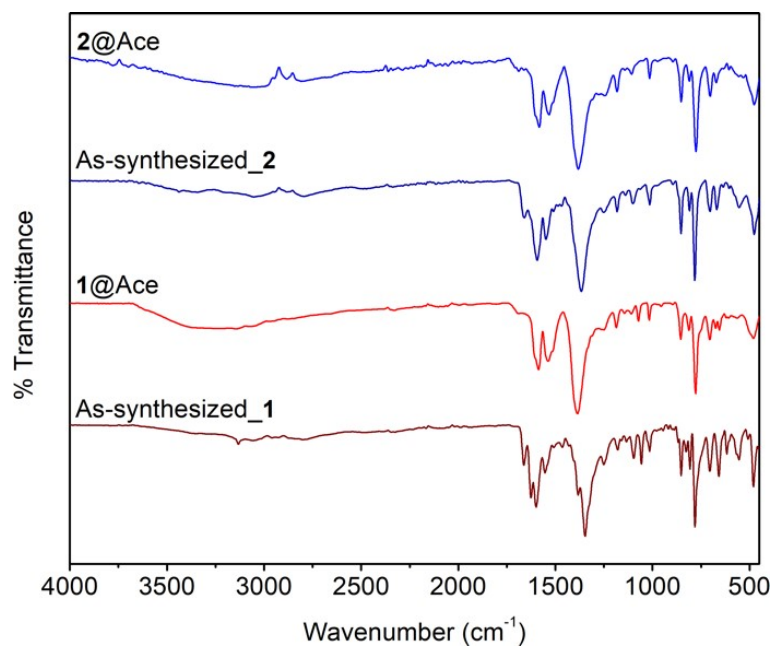

(a)

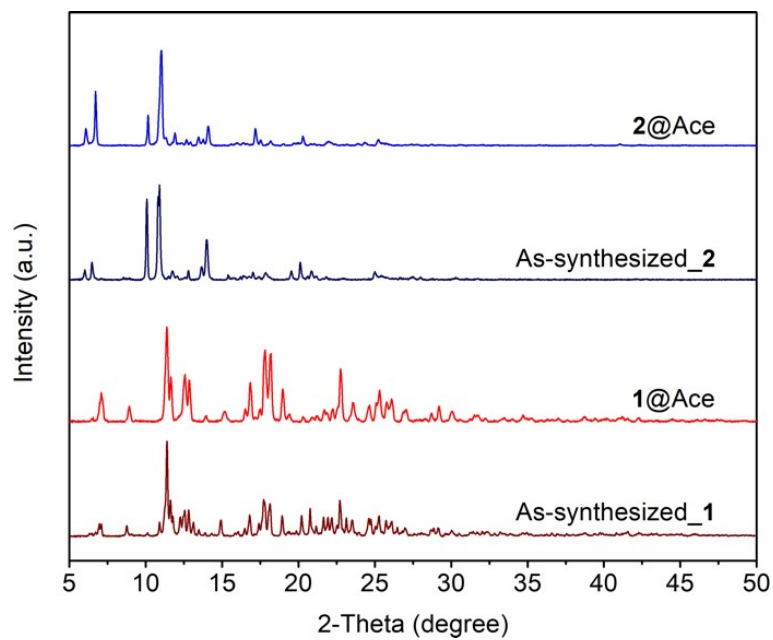

(b)

**Fig. S9** (a) IR spectra and (b) PXRD patterns of **1** and **2** after soaking in acetone.

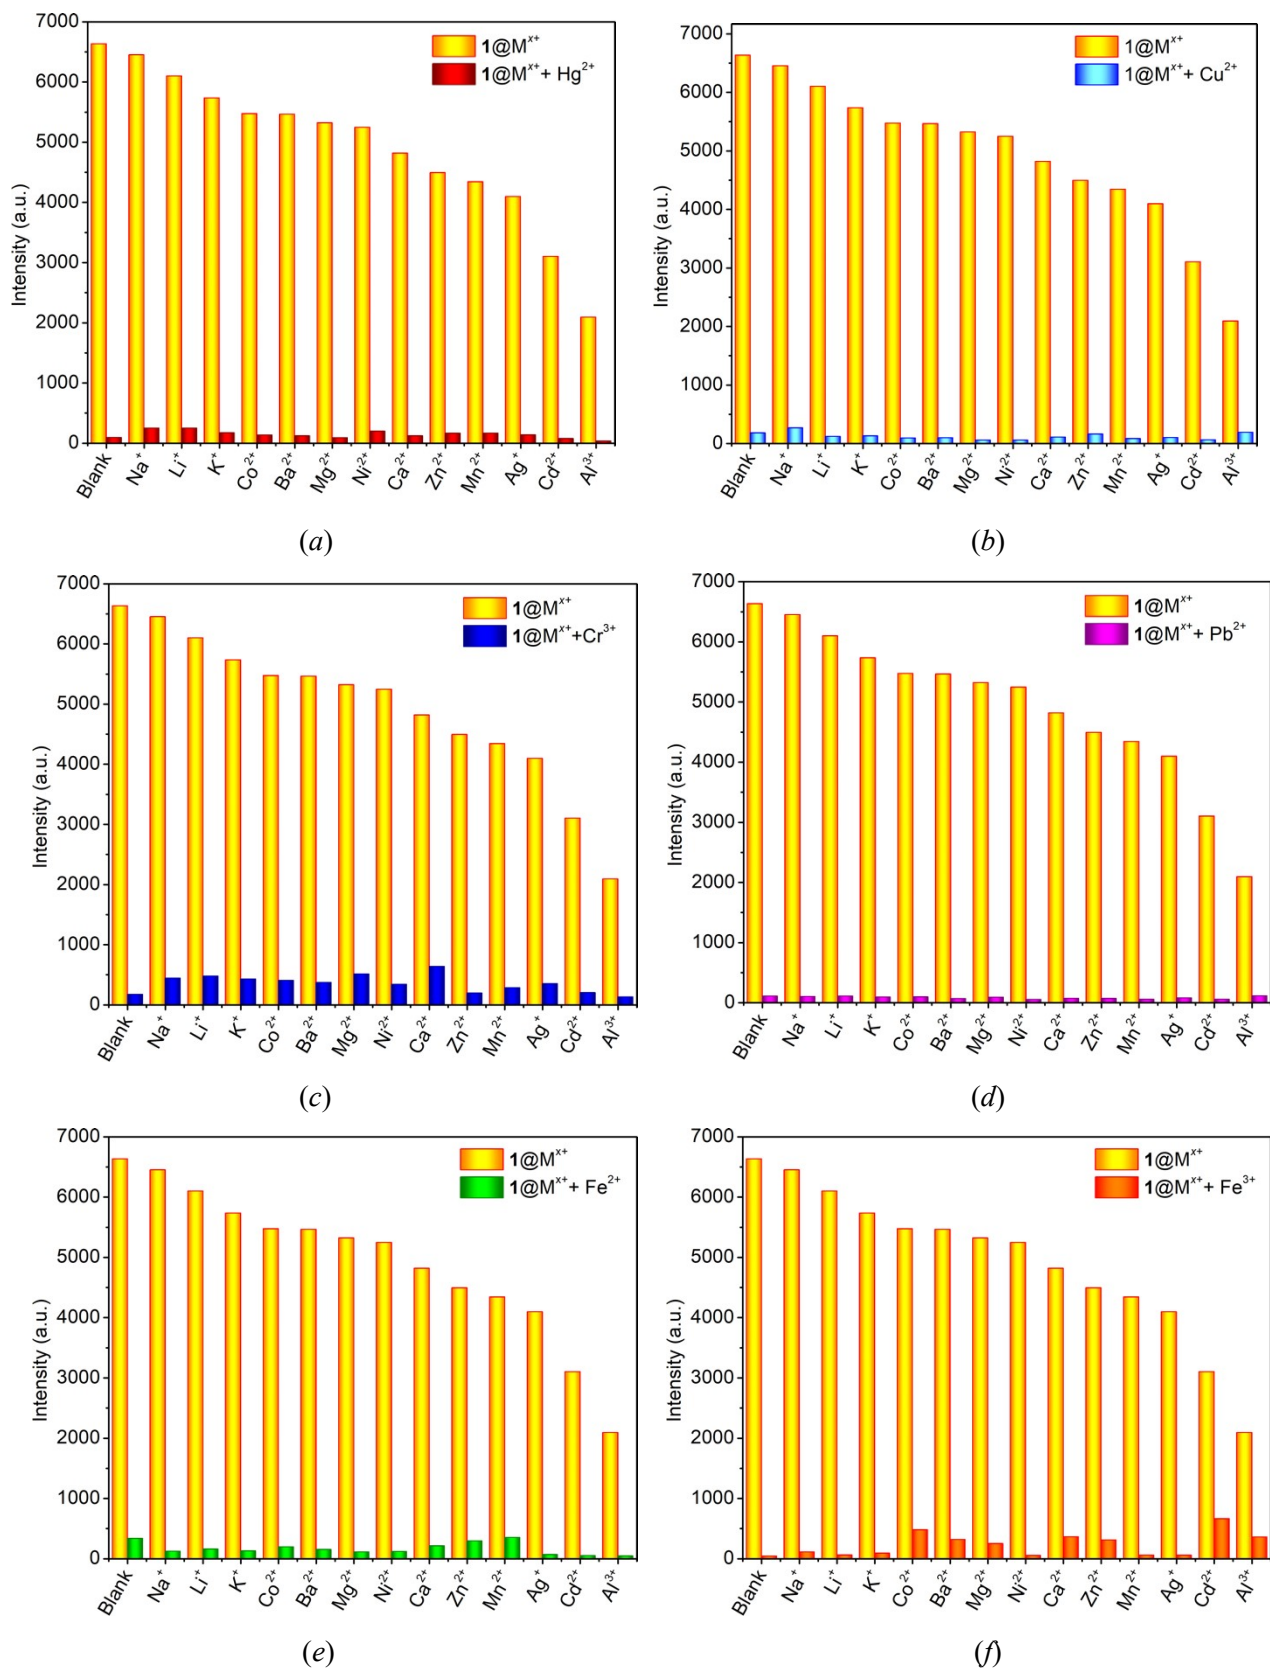

**Fig. S10** Relative luminescence intensities of **1** dispersed in the aqueous solutions of individual metal ions (yellow columns) and the quenched luminescence intensities after the addition of (a) Hg<sup>2+</sup>, (b) Cu<sup>2+</sup>, (c) Cr<sup>3+</sup>, (d) Pb<sup>2+</sup>, (e) Fe<sup>2+</sup>, and (f) Fe<sup>3+</sup> ions.

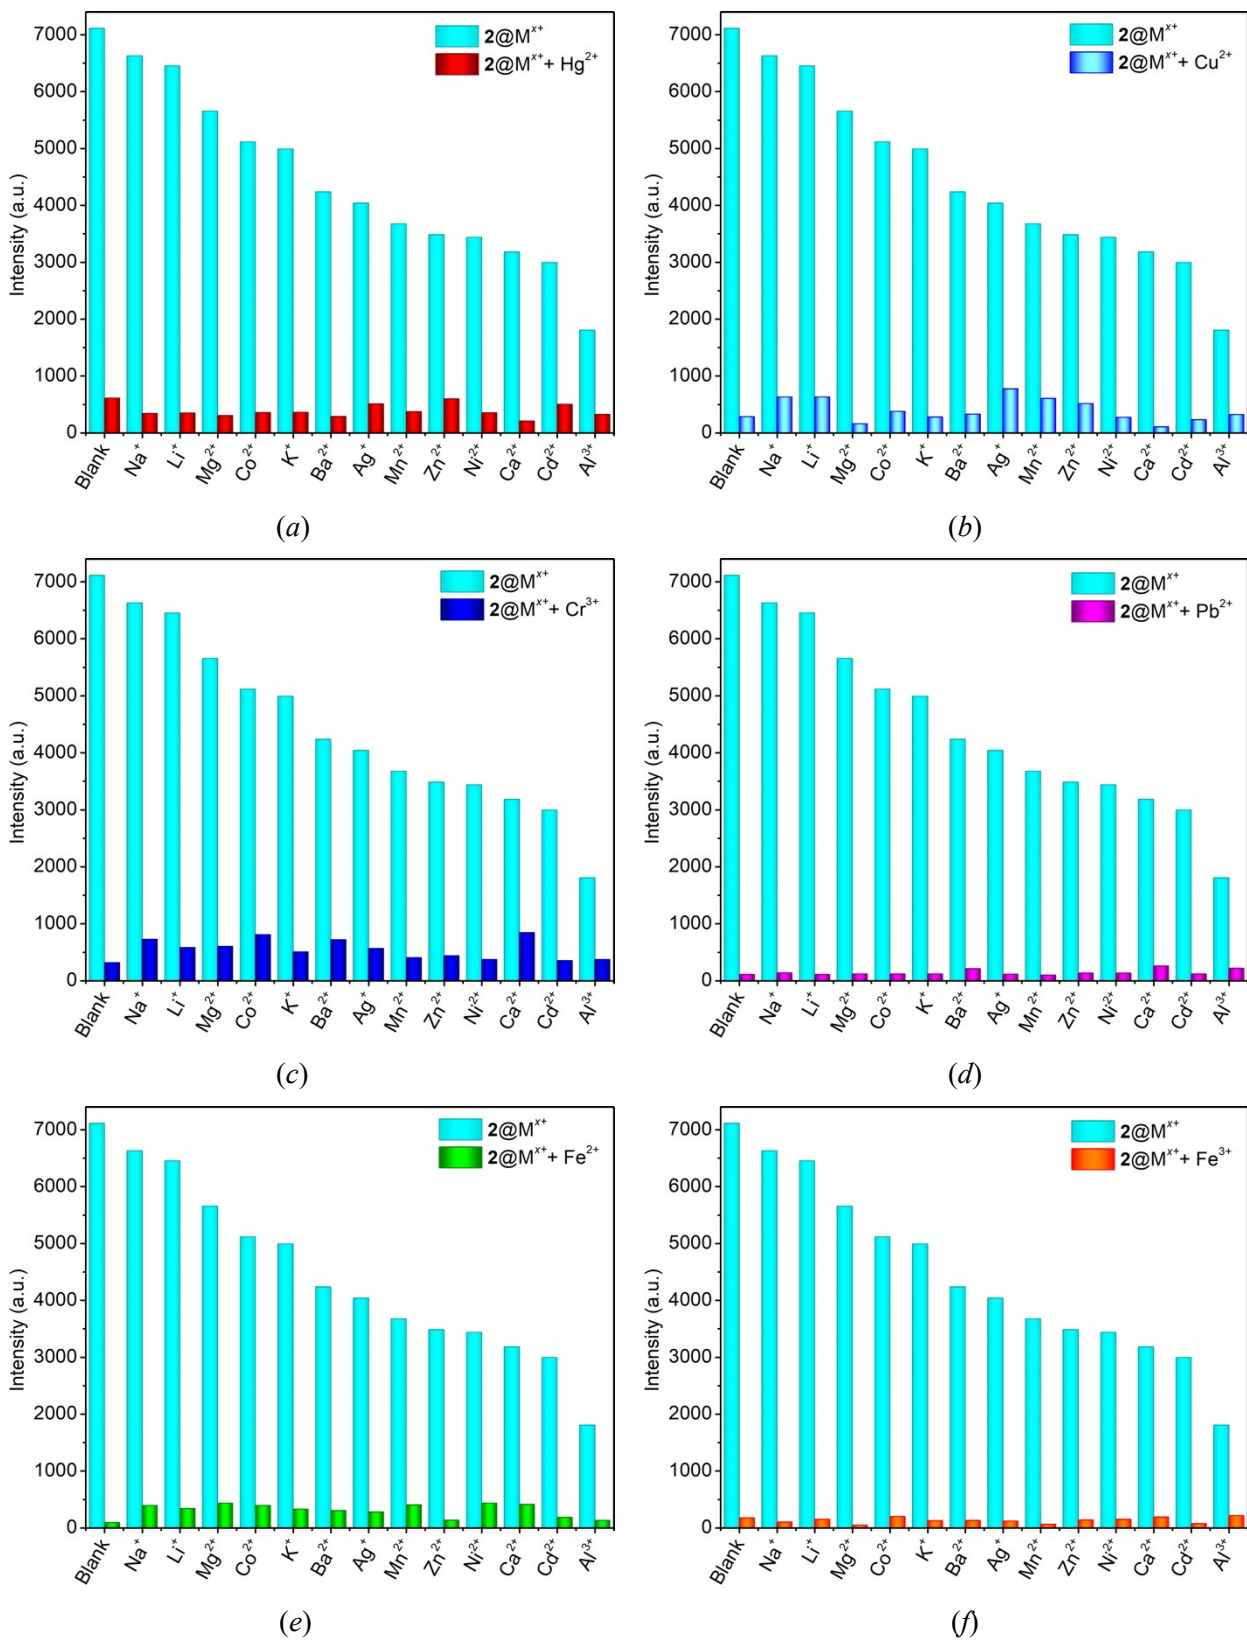

**Fig. S11** Relative luminescence intensities of **2** dispersed in aqueous solutions of individual metal ions (turquoise columns) and the quenched luminescence intensities after the addition of (a) Hg<sup>2+</sup>, (b) Cu<sup>2+</sup>, (c) Cr<sup>3+</sup>, (d) Pb<sup>2+</sup>, (e) Fe<sup>2+</sup>, and (f) Fe<sup>3+</sup> ions.

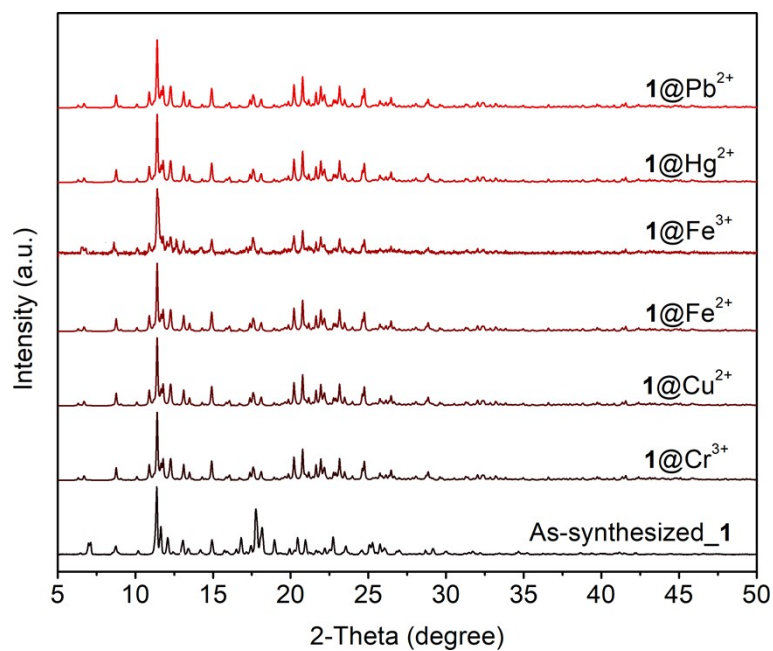

(a)

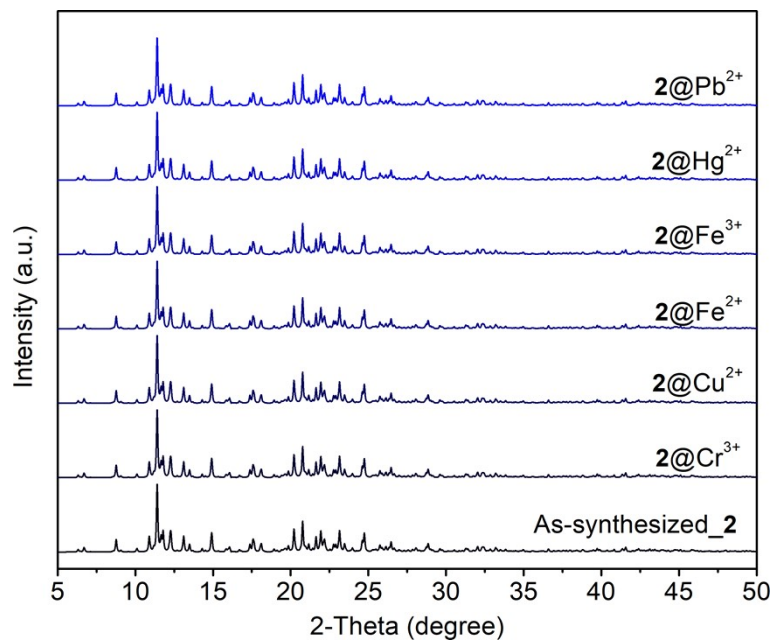

(b)

**Fig. S12** PXRD patterns of (a) **1** and (b) **2** before and after the fluorescence quenching experiments.



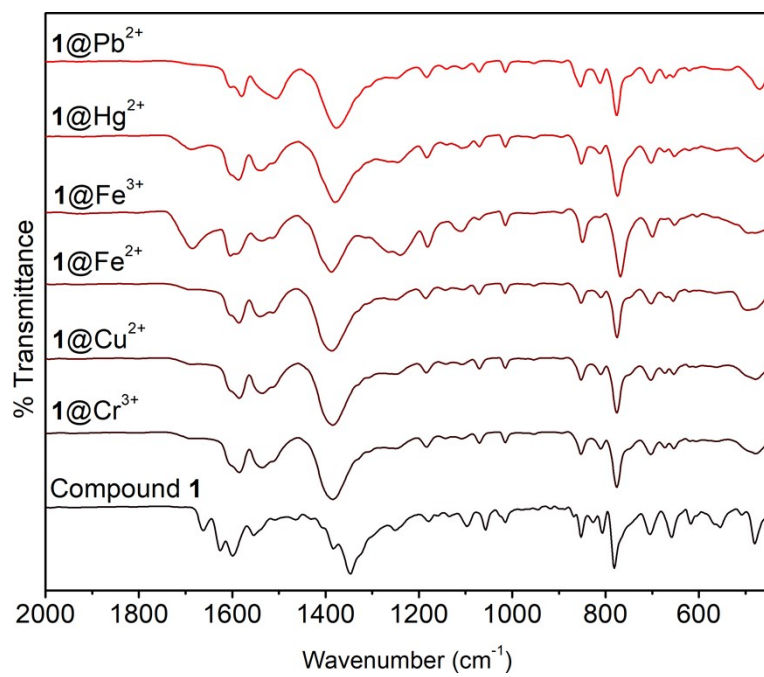

(a)

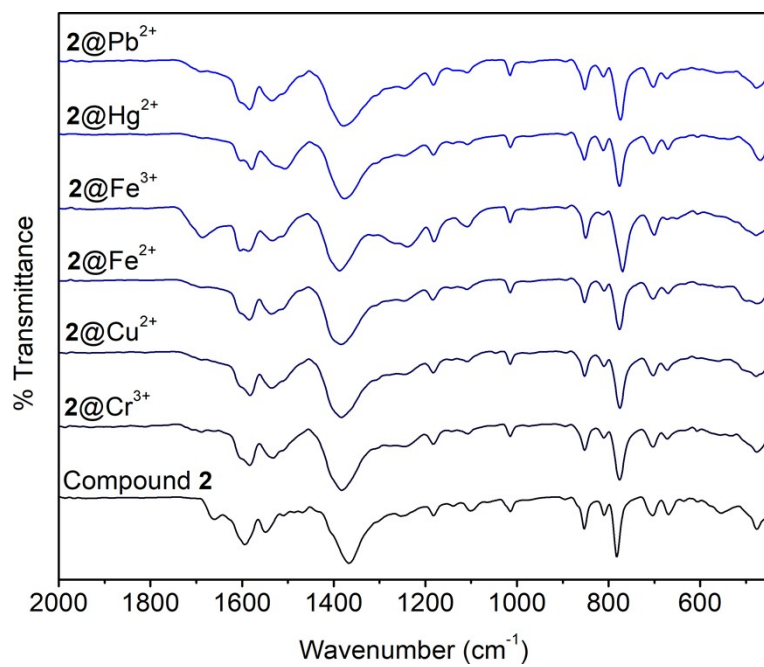

(b)

**Fig. S13** IR spectra of (a) **1** and (b) **2** before and after the fluorescence quenching experiments.

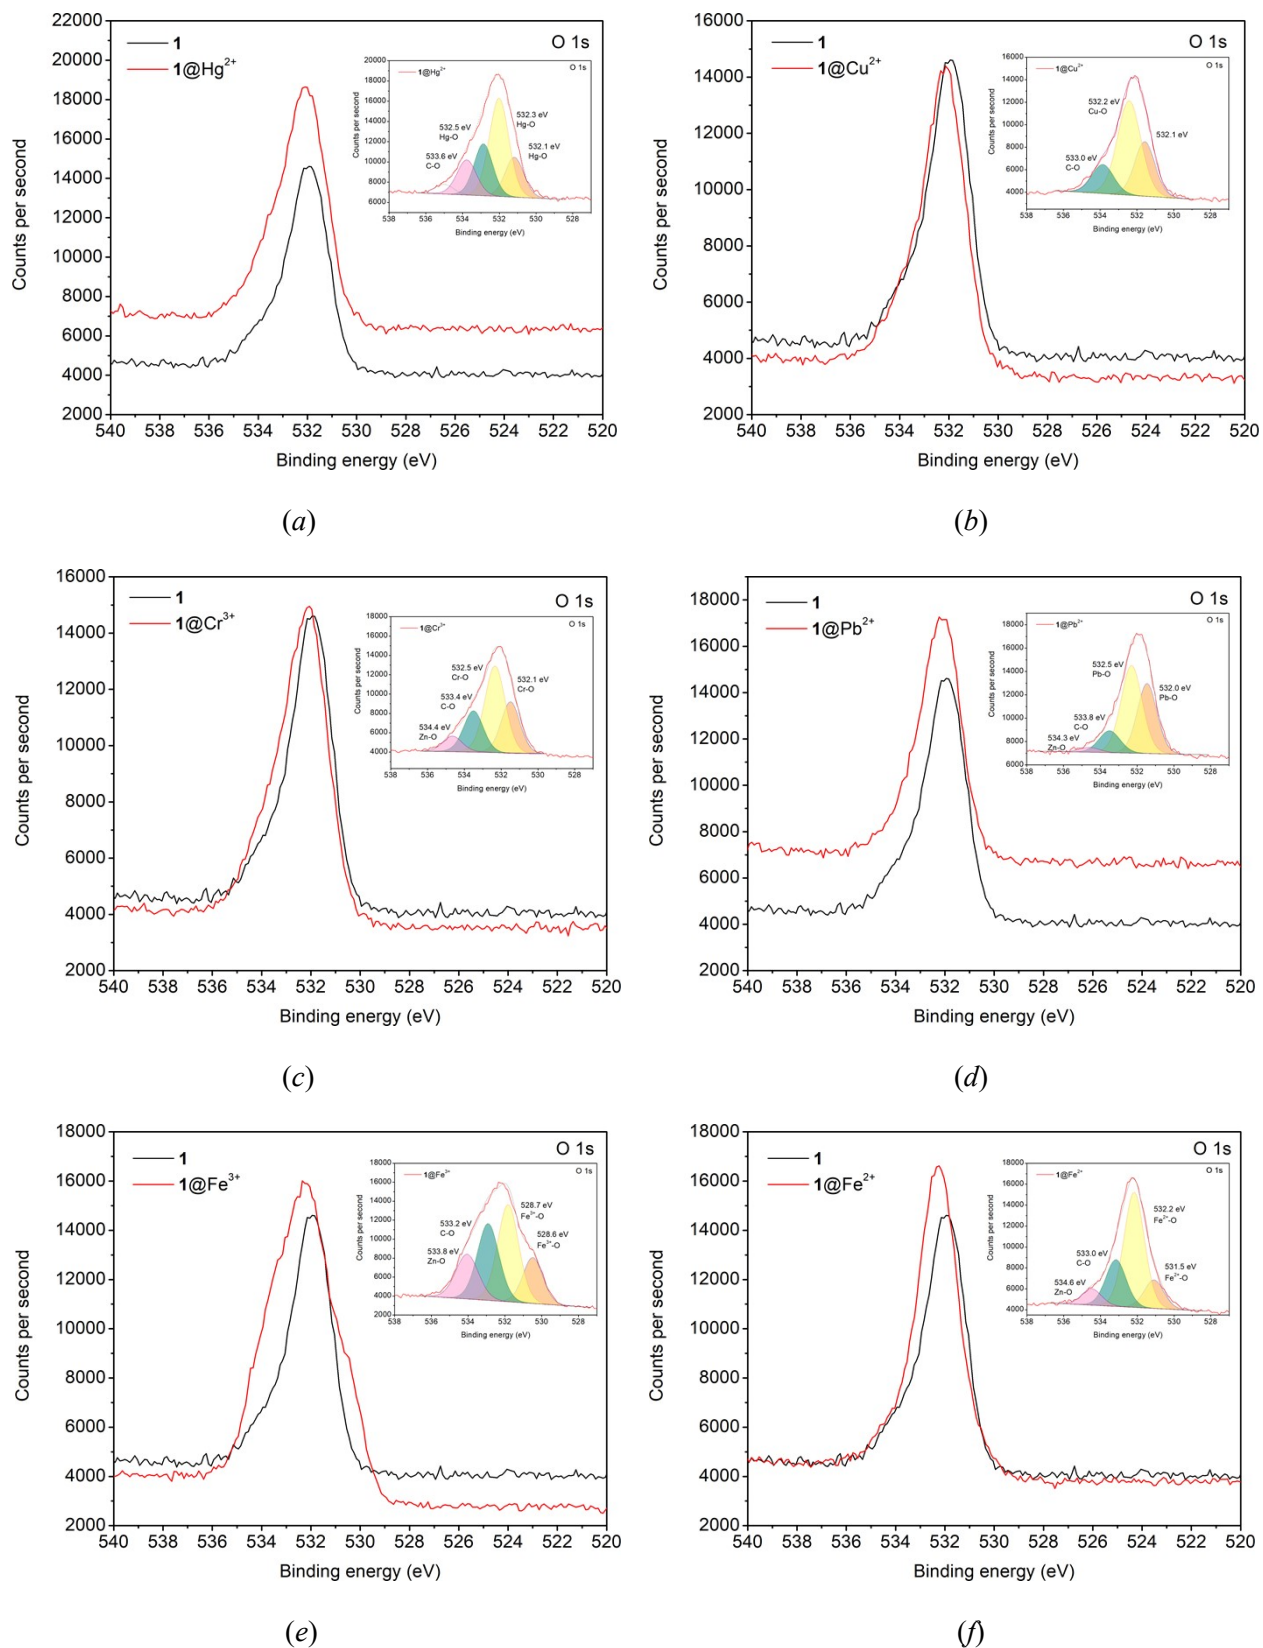

**Fig. S14** High resolution XPS spectra of O 1s core levels of **1** (black) and its metal incorporated forms (red) (a) **1@Hg<sup>2+</sup>**, (b) **1@Cu<sup>2+</sup>**, (c) **1@Cr<sup>3+</sup>**, (d) **1@Pb<sup>2+</sup>**, (e) **1@Fe<sup>3+</sup>**, and (f) **1@Fe<sup>2+</sup>**.

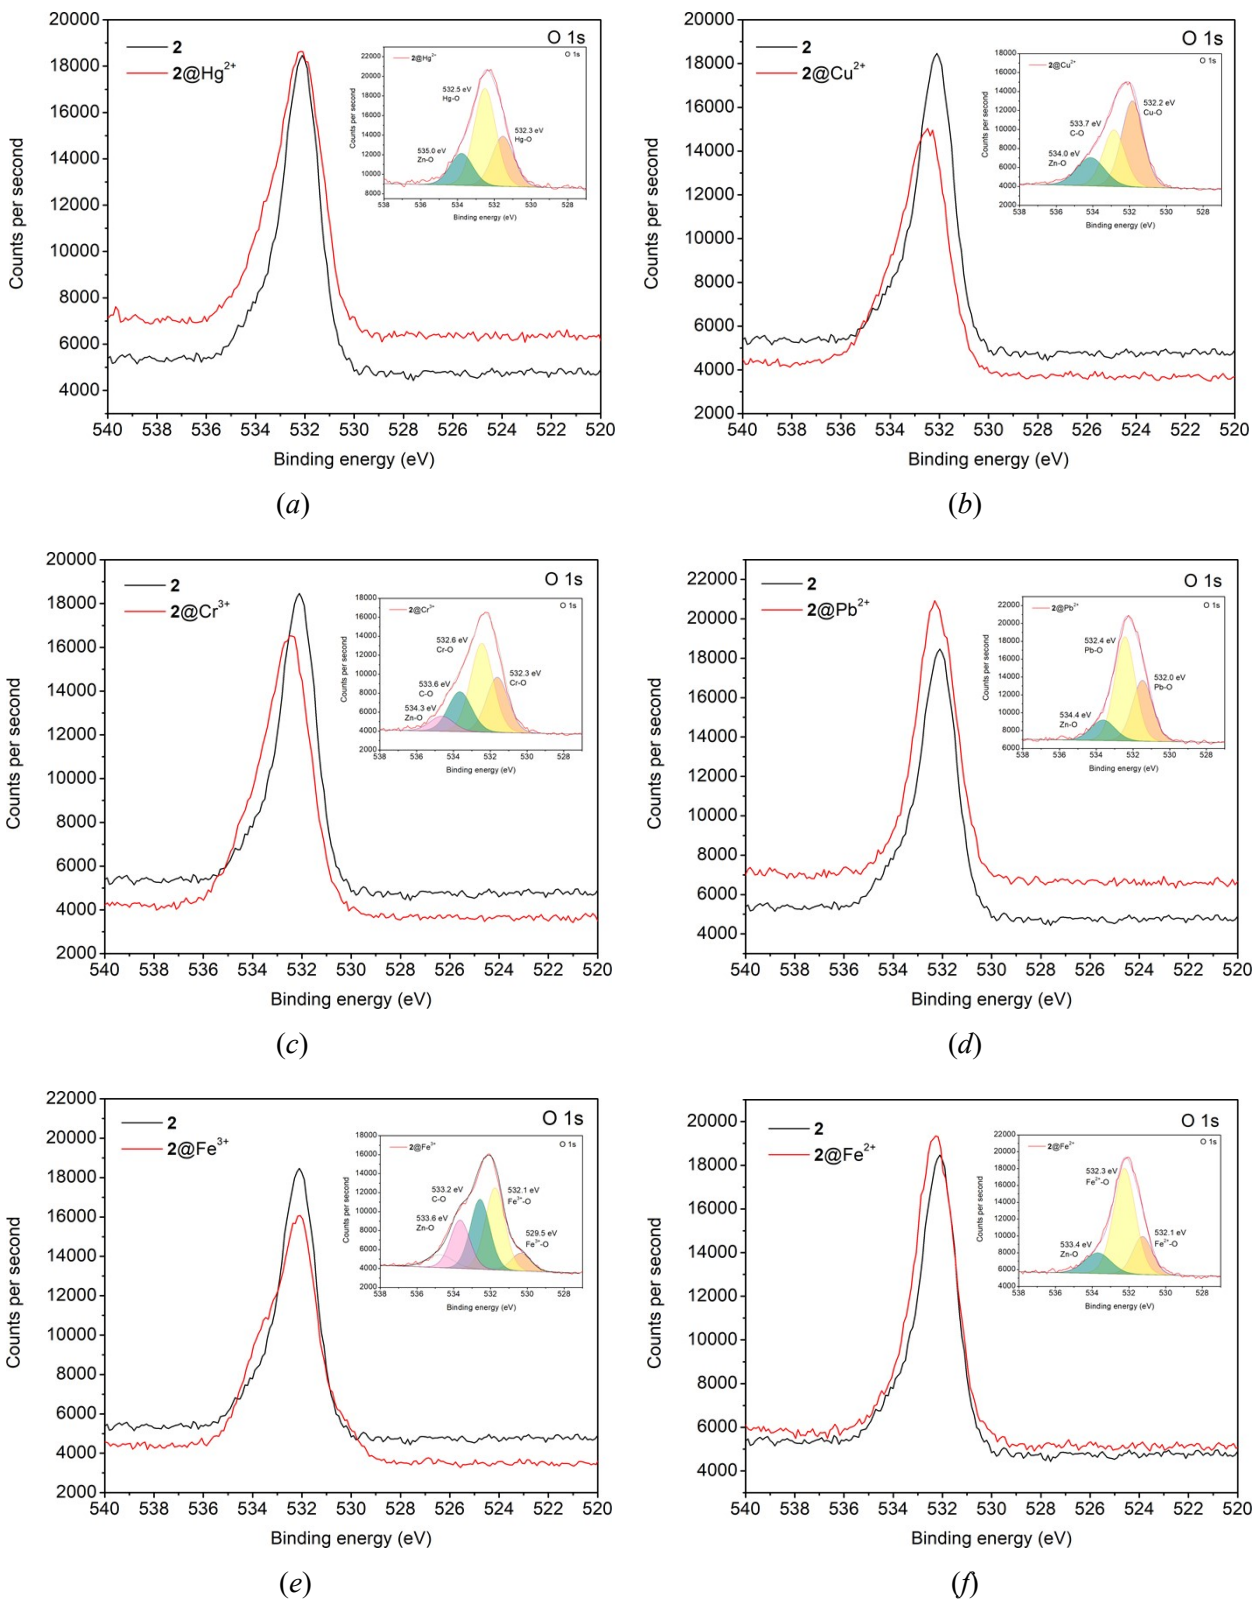

**Fig. S15** High resolution XPS spectra of O 1s core levels of **2** (black) and its metal incorporated forms (red) (a) **2@Hg<sup>2+</sup>**, (b) **2@Cu<sup>2+</sup>**, (c) **2@Cr<sup>3+</sup>**, (d) **2@Pb<sup>2+</sup>**, (e) **2@Fe<sup>3+</sup>**, and (f) **2@Fe<sup>2+</sup>**.

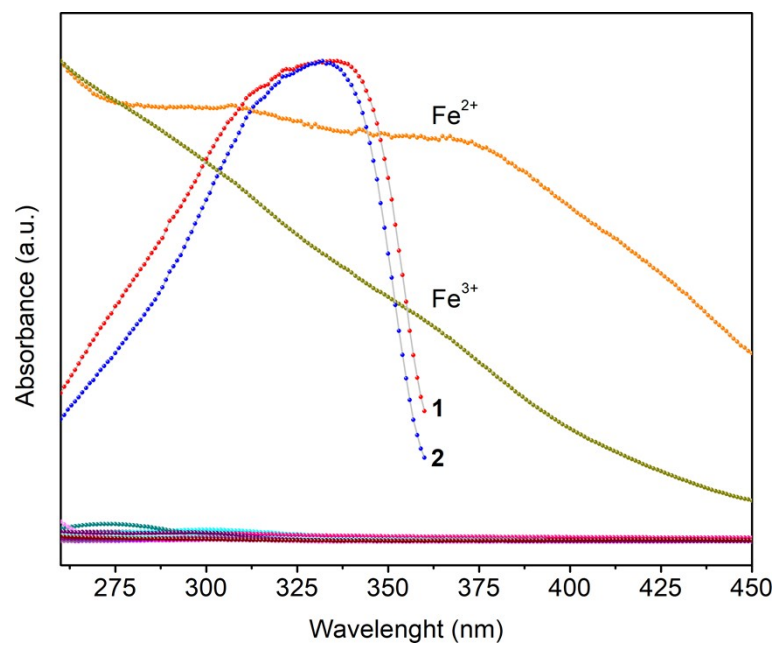

**Fig. S16** The UV-vis absorbance spectra of aqueous solutions containing individual metal ions together with excitation spectra of **1** and **2**.

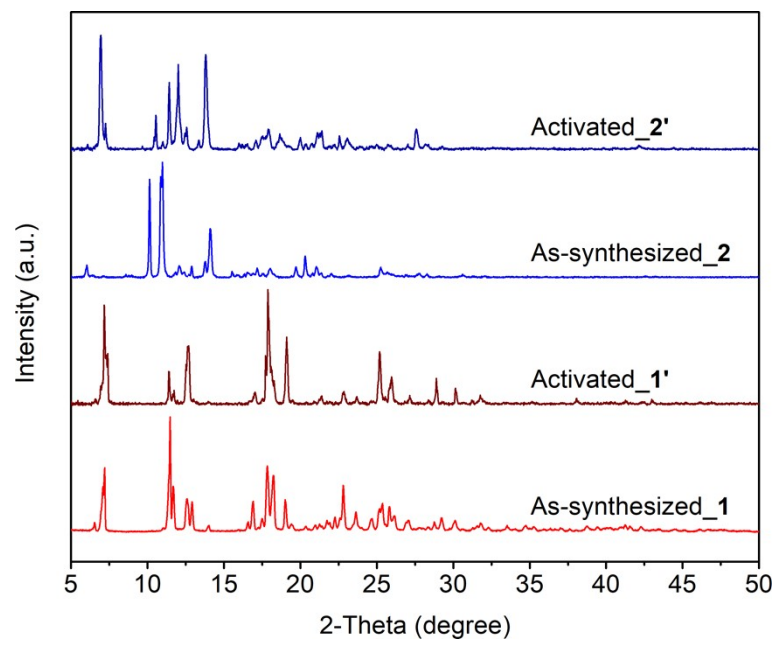

**Fig. S17** Comparison PXRD patterns of the as-synthesized **1** and **2** and their activated samples **1'** and **2'**.

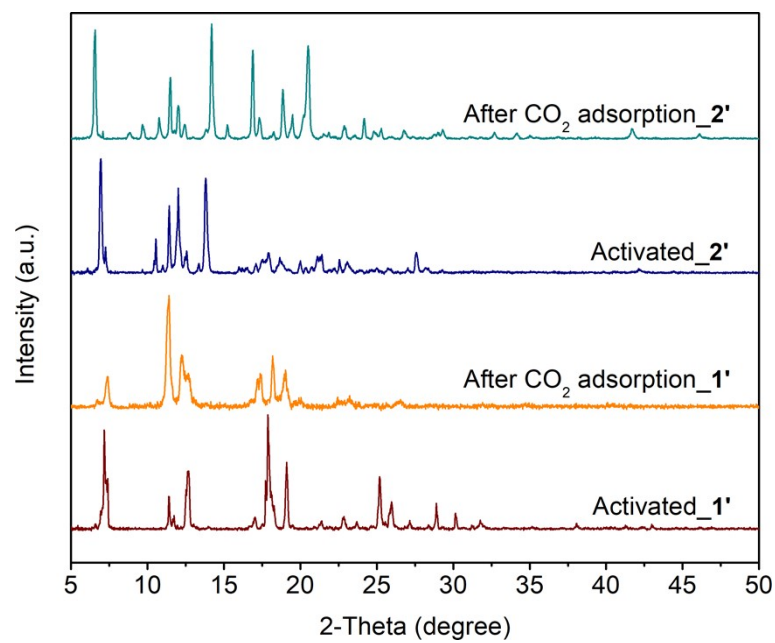

**Fig. S18** Comparison PXRd patterns of activated **1'** and **2'** and those samples after high-pressure (up to 20 bar) CO<sub>2</sub> sorption at 338 K (65 °C).
